# Supplementary material for: Immune Profile of Blood, Tissue and Peritoneal Fluid: A Comparative Study in High Grade Serous Epithelial Ovarian Cancer Patients at Interval Debulking Surgery
Source: MDPI journal article supplement (doi:10.3390/vaccines10122121), 2022-12-12
Supplement: s1 [file s1]

**Supplementary Table S1** Details of antibodies used in the study

| Panel for NK cell receptors             |        |                                            |        |
|-----------------------------------------|--------|--------------------------------------------|--------|
| Panel 1<br>Fluorescent labeled antibody | Clone  | Panel 2<br>Fluorescent labeled<br>antibody | Clone  |
| Vivid dye- BV421                        |        | Vivid-Dye-BV421                            |        |
| CD45-PECY5.5                            | HI30   | CD45-PECY5.5                               | HI30   |
| CD56-PE                                 | 5.1H11 | CD56-PE                                    | 5.1H11 |
| CD3-PECF594                             | UCHT1  | CD3-PECF594                                | UCHT1  |
| NKG2D-APC-CY7                           | 1D11   | NKp44-PECY7                                | P44-8  |
| CD161-BV480                             | DX12   | NKG2C-AF488                                | 134522 |
| DNAM-1-BV786                            | 11A8   | KIR2DL1/S1-APC                             | EB6B   |
| NKp30-BV605                             | p30-15 | KIR3DL1-BV786                              | DX9    |
| NKp46-PerCP-cy5.5                       | 9E2    |                                            |        |
| NKG2A-APC                               | 131411 |                                            |        |
| KIR2DL2/L3/S3-AF488                     | 180704 |                                            |        |
