# Supplementary material for: Immune Profile of Blood, Tissue and Peritoneal Fluid: A Comparative Study in High Grade Serous Epithelial Ovarian Cancer Patients at Interval Debulking Surgery
Source: MDPI journal article supplement (doi:10.3390/vaccines10122121), 2022-12-12
Supplement: s1 [file s1]

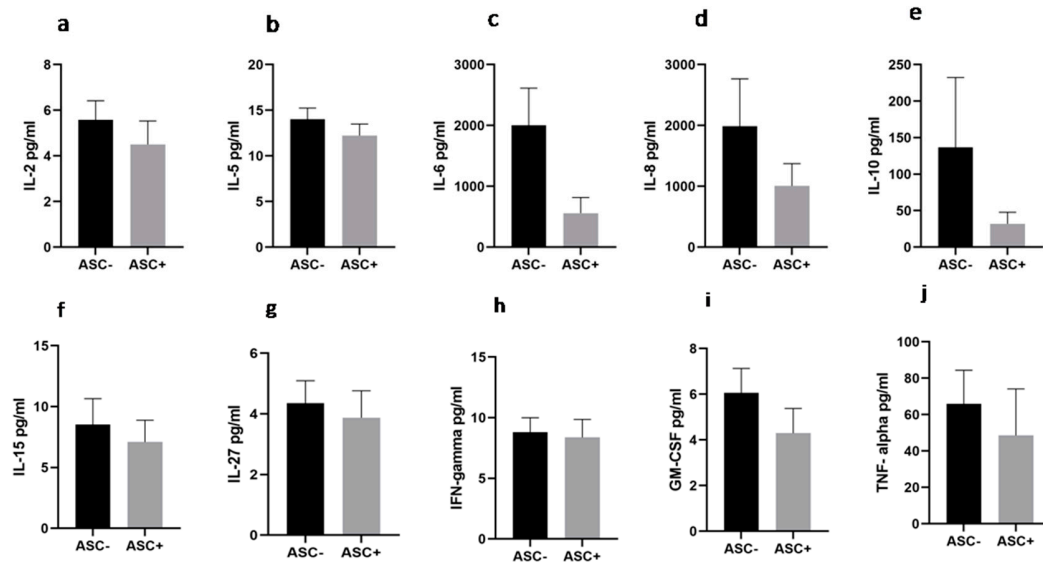

**Supplementary Figure S2** Cytokine profile in fluid cytology positive (ASC+) and fluid cytology negative (ASC-) peritoneal fluid (PF) sample of HGSOC patients
