# Supplementary figures and images for: Immune Profile of Blood, Tissue and Peritoneal Fluid: A Comparative Study in High Grade Serous Epithelial Ovarian Cancer Patients at Interval Debulking Surgery
Source: MDPI journal article supplement (doi:10.3390/vaccines10122121), 2022-12-12

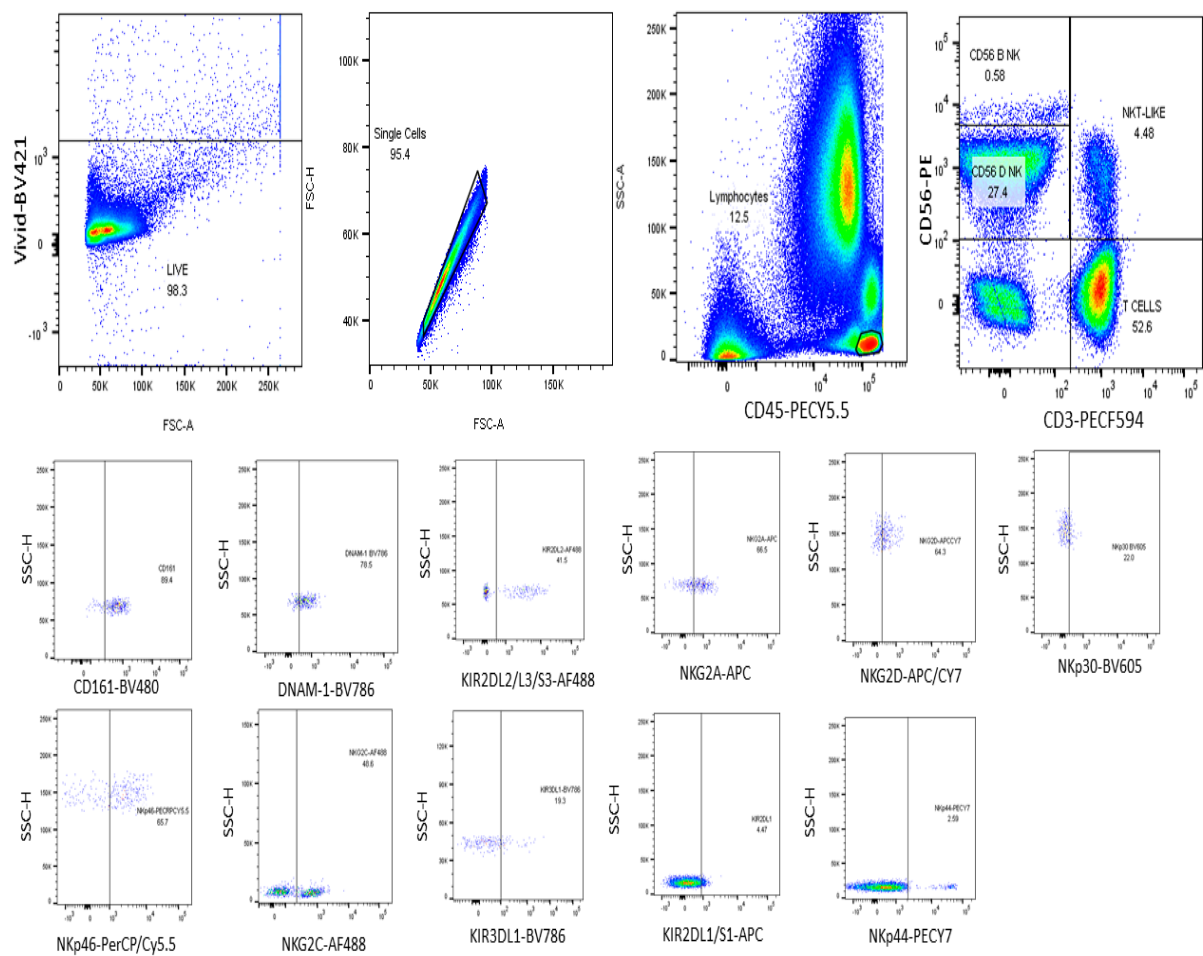

**Supplementary Figure S1** Representative gating strategy for NK cell receptors

Supplement: s1 [file s1]
